# Supplementary material for: Loss of the Novel Mitochondrial Membrane Protein FAM210B Is Associated with Hepatocellular Carcinoma
Source: MDPI journal article supplement (doi:10.3390/biomedicines11041232), 2023-04-21
Supplement: s1 [file s1]

## Supplementary Material

Supplementary Figure S1

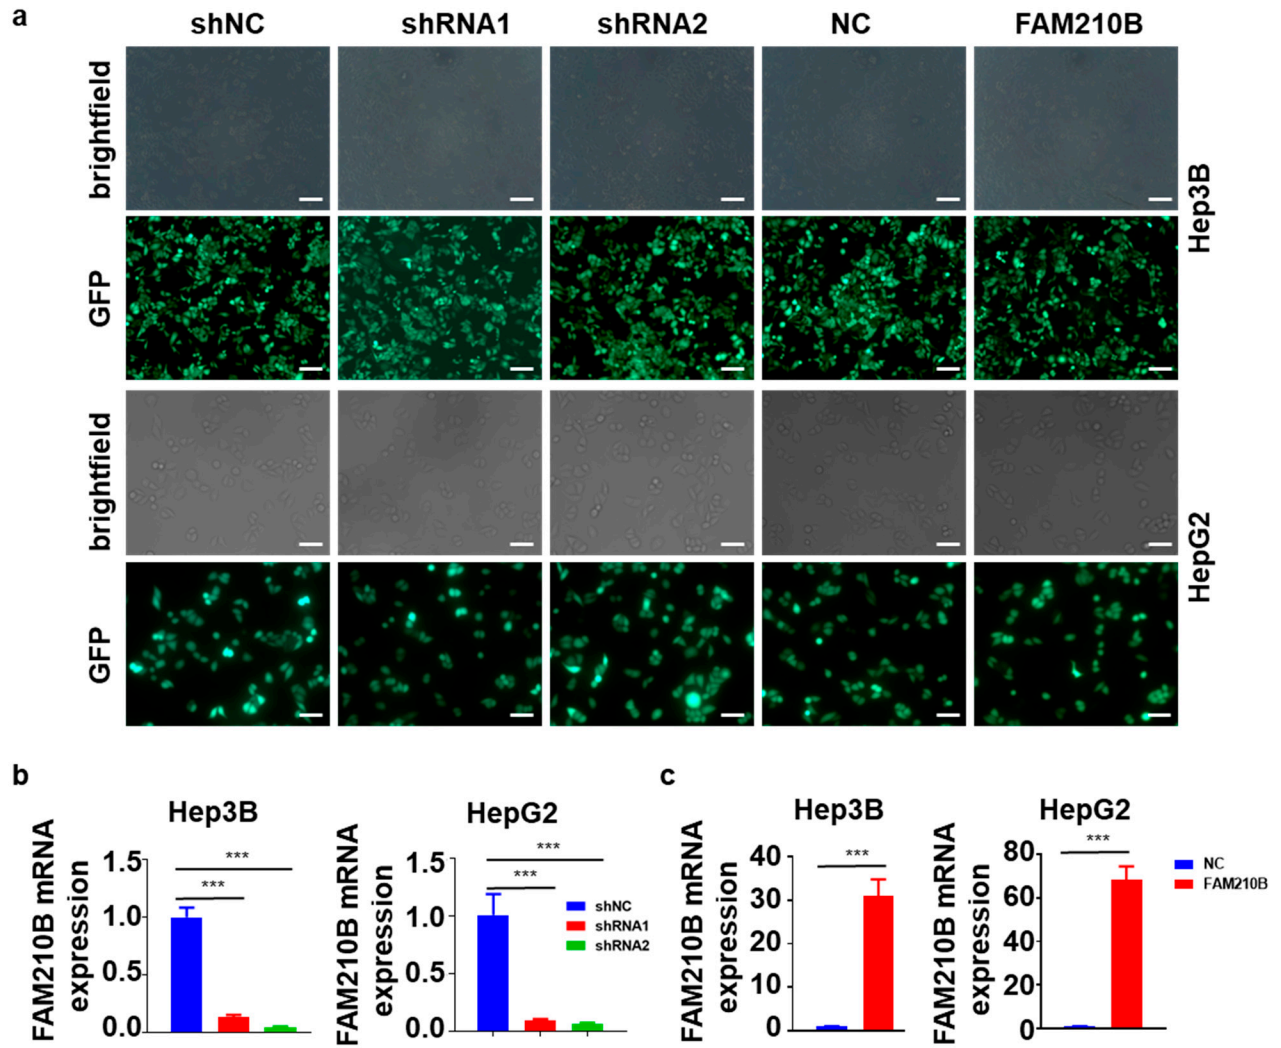

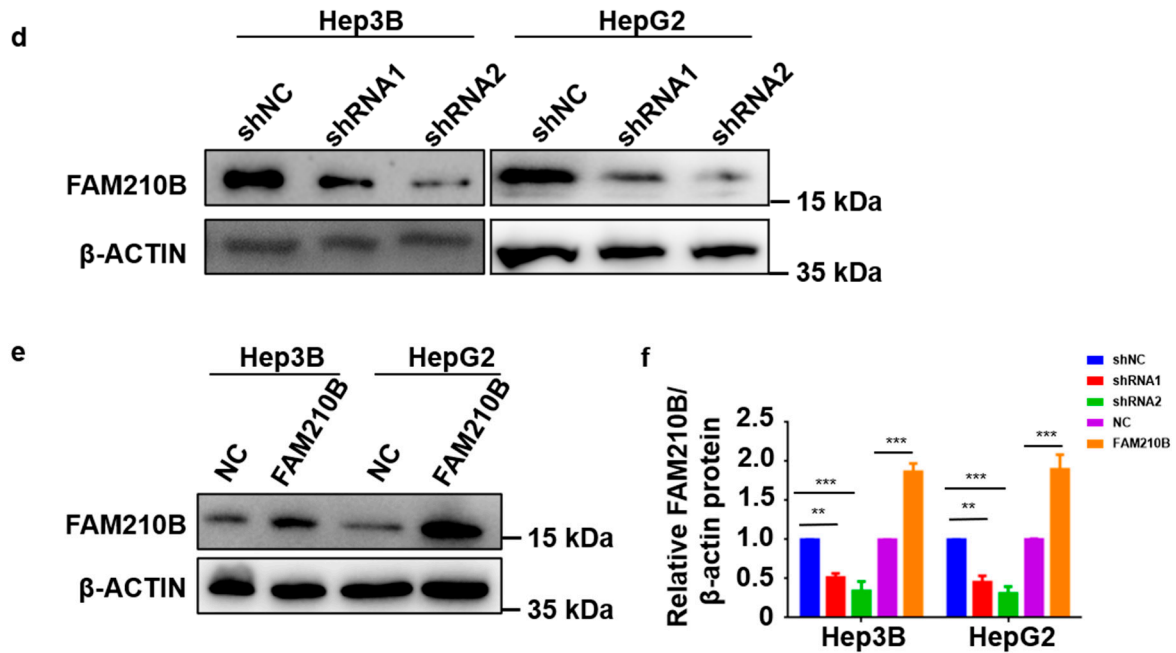

**Supplementary Figure S1. Transfection efficiency was measured.** (a) The fluorescence microscopy images of cells transfected with lentivirus. (Scale bar=200um). (b, c) The FAM210B mRNA levels were determined in Hep3B and HepG2 cells after infection with FAM210B shRNA lentivirus or FAM210B overexpression lentivirus. (d, e) The FAM210B protein levels were measured in Hep3B and HepG2 cells following infection with FAM210B shRNA lentivirus or FAM210B overexpression lentivirus. (f) Quantitative analysis of FAM210B in Western blot. \*\*  $p < 0.01$ ; \*\*\*  $p < 0.001$ .

**Supplementary Table S1****Characteristics of the cell lines that were used**

| Cell line | Organism | Tissue and Cell Type     | characteristic            | Morphology |
|-----------|----------|--------------------------|---------------------------|------------|
| HL02      | human    | normal liver             | -                         | Epithelium |
| Hep3B     | human    | hepatocellular carcinoma | HBV positive              | Epithelium |
| HepG2     | human    | Hepatocellular carcinoma | Secrete plasma protein    | Epithelium |
| LM3       | human    | Hepatocellular carcinoma | High metastasis           | Epithelium |
| Huh7      | human    | Hepatocellular carcinoma | Secrete alpha fetoprotein | Epithelium |
| PLC       | human    | Hepatocellular carcinoma | Secrete HBsAg             | Epithelium |
